# Supplementary material
Source: PubMed Central journal article supplement (PMC3761308)
Supplement: 5a7a68d58264931c596b798f3253af5f_genetics.113.152918-10.pdf [file 5a7a68d58264931c596b798f3253af5f_genetics.113.152918-10.pdf]

**Table S2** List of experimental treatments in this *S. bayanus* gene expression compendium.

| Condition                         | number of datasets (arrays) |
|-----------------------------------|-----------------------------|
| growth at different temperatures  | 1 (3)                       |
| heat shock                        | 4 (18)                      |
| ammonium                          | 1 (6)                       |
| cadmium                           | 1 (4)                       |
| copper                            | 1 (6)                       |
| lead                              | 1 (6)                       |
| nickel                            | 1 (5)                       |
| sulfite toxicity                  | 1 (6)                       |
| zinc                              | 1 (6)                       |
| ethanol toxicity                  | 1 (6)                       |
| sorbitol                          | 1 (6)                       |
| bleach                            | 1 (6)                       |
| hydrogen peroxide                 | 3 (18)                      |
| 2-deoxyglucose                    | 1 (6)                       |
| hydroxyurea                       | 1 (6)                       |
| lovastatin                        | 1 (4)                       |
| MG-132                            | 1 (5)                       |
| MMS                               | 1 (6)                       |
| rapamycin                         | 1 (6)                       |
| tunicamycin                       | 1 (6)                       |
| zeocin                            | 1 (6)                       |
| chronological aging               | 3 (13)                      |
| diauxic shift                     | 1 (6)                       |
| galactose                         | 1 (5)                       |
| glycerol                          | 1 (4)                       |
| sucrose                           | 1 (4)                       |
| auxotroph starvation              | 1 (11)                      |
| nutrient limited chemostat growth | 3 (7)                       |
| mating type and ploidy            | 1 (3)                       |
| alpha factor                      | 1 (8)                       |
| cell cycle                        | 1 (30)                      |
| sporulation                       | 3 (18)                      |
| strain backgrounds                | 1 (4)                       |
| cross progeny                     | 1 (22)                      |
| Tn7 insertions                    | 1 (27)                      |
| Total                             | 46 (303)                    |
