# Supplementary material
Source: PubMed Central journal article supplement (PMC3761308)
Supplement: 8eb46c78b5e69b67d592a23c928a5336_genetics.113.152918-7.pdf [file 8eb46c78b5e69b67d592a23c928a5336_genetics.113.152918-7.pdf]

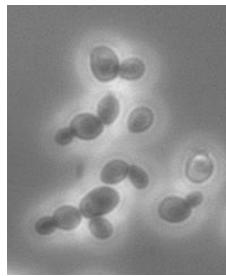

Diploid *S. bayanus*  
Wild type

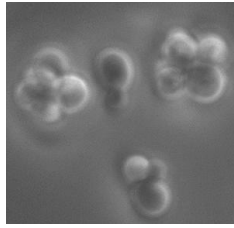

Haploid *S. bayanus*  
Wild type

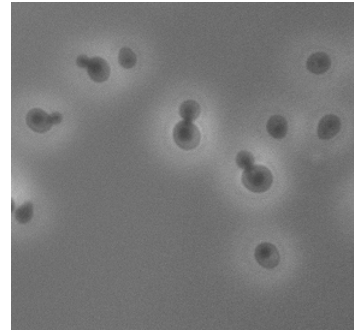

Haploid *S. bayanus*  
*678.66* KO  
*Sbayamn1*

**Figure S4** Haploid-specific cell clumping is disrupted in a mutant of *678.66* (ortholog of *AMN1*). Phase contrast micrographs are shown of diploid cells and of *678.66* and wild type haploid cells.
