# Supplementary material
Source: PubMed Central journal article supplement (PMC3761308)
Supplement: 86440632a546a5d26753a7d755775ed6_genetics.113.152918-13.pdf [file 86440632a546a5d26753a7d755775ed6_genetics.113.152918-13.pdf]

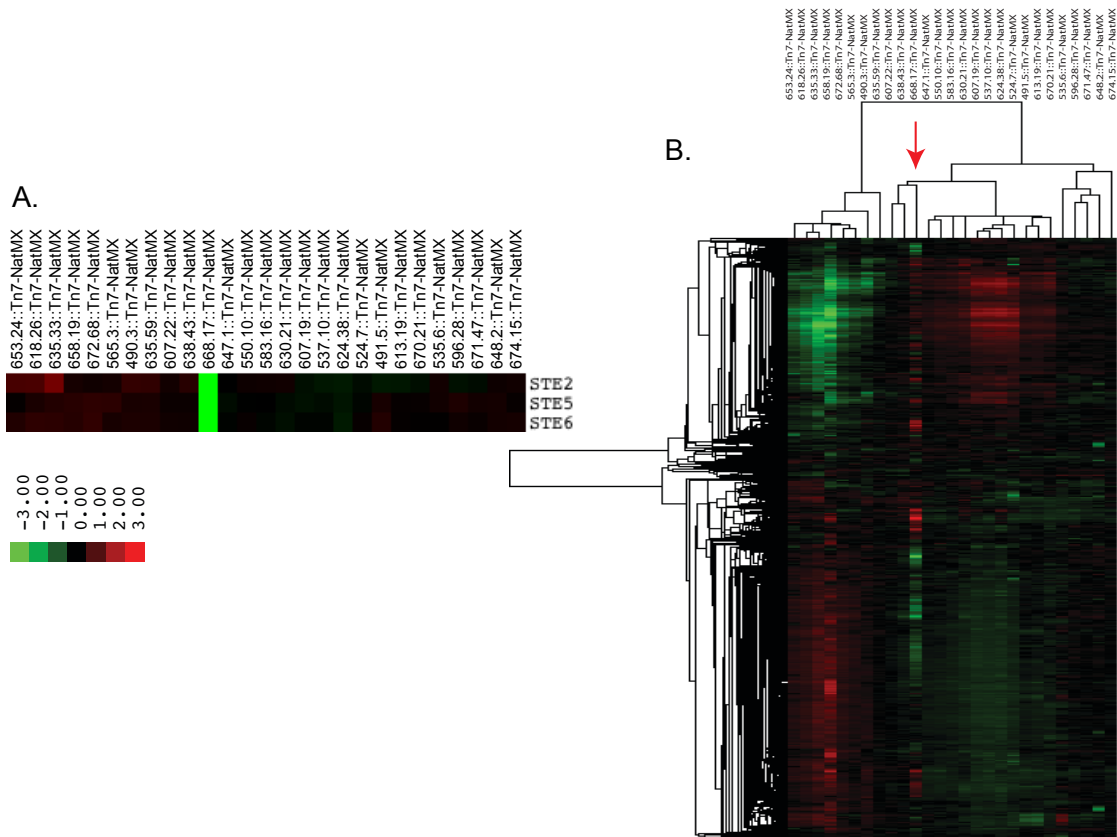

**Figure S5** The *668.17* knockout mutant (ortholog of *ARD1*) shows changes in gene expression of mating-type specific genes, as well as global changes in expression. A. The data for the Tn7 insertion strains were selected from the megacluster (data in Table S3), and expression levels of *STE2*, *STE5*, and *STE6* is shown. B. The genome wide expression data Tn7 insertion strains was hierarchically clustered by both gene and experiment. The column corresponding to the *668.17::Tn7-NatMX* mutant is indicated with a red arrow.
