# Supplementary material
Source: PubMed Central journal article supplement (PMC3761308)
Supplement: a634b596d7718210fe78e8edaf0c5b48_genetics.113.152918-6.pdf [file a634b596d7718210fe78e8edaf0c5b48_genetics.113.152918-6.pdf]

**Table S6 Position weight matrices of the motifs enriched in the oxidative stress cluster.** These motifs were determined using the SCOPE server (<http://genie.dartmouth.edu/scope/>).

PWM: Similar to K31 from Kellis, M. et al., in Nature (2003), with p value  $1.61 \times 10^{-5}$  as determined by STAMP.

|   | m  | t  | k  | a  | s  | t  | a  | a  |
|---|----|----|----|----|----|----|----|----|
| a | 29 | 0  | 0  | 54 | 0  | 0  | 54 | 54 |
| c | 25 | 0  | 0  | 0  | 32 | 0  | 0  | 0  |
| g | 0  | 0  | 9  | 0  | 22 | 0  | 0  | 0  |
| t | 0  | 54 | 45 | 0  | 0  | 54 | 0  | 0  |

PWM: Similar to K25 with  $7 \times 10^{-5}$  from Kellis, M. et al., in Nature (2003), with p value  $1.61 \times 10^{-5}$  as determined by STAMP.

|   | c  | n  | c  | g  | g  | m  |
|---|----|----|----|----|----|----|
| a | 0  | 12 | 0  | 0  | 0  | 25 |
| c | 49 | 8  | 49 | 0  | 0  | 24 |
| g | 0  | 17 | 0  | 49 | 49 | 0  |
| t | 0  | 12 | 0  | 0  | 0  | 0  |
