# Supplementary material
Source: PubMed Central journal article supplement (PMC3761308)
Supplement: ee35eec34dc5973d41915e59da3c32bc_genetics.113.152918-11.pdf [file ee35eec34dc5973d41915e59da3c32bc_genetics.113.152918-11.pdf]

A

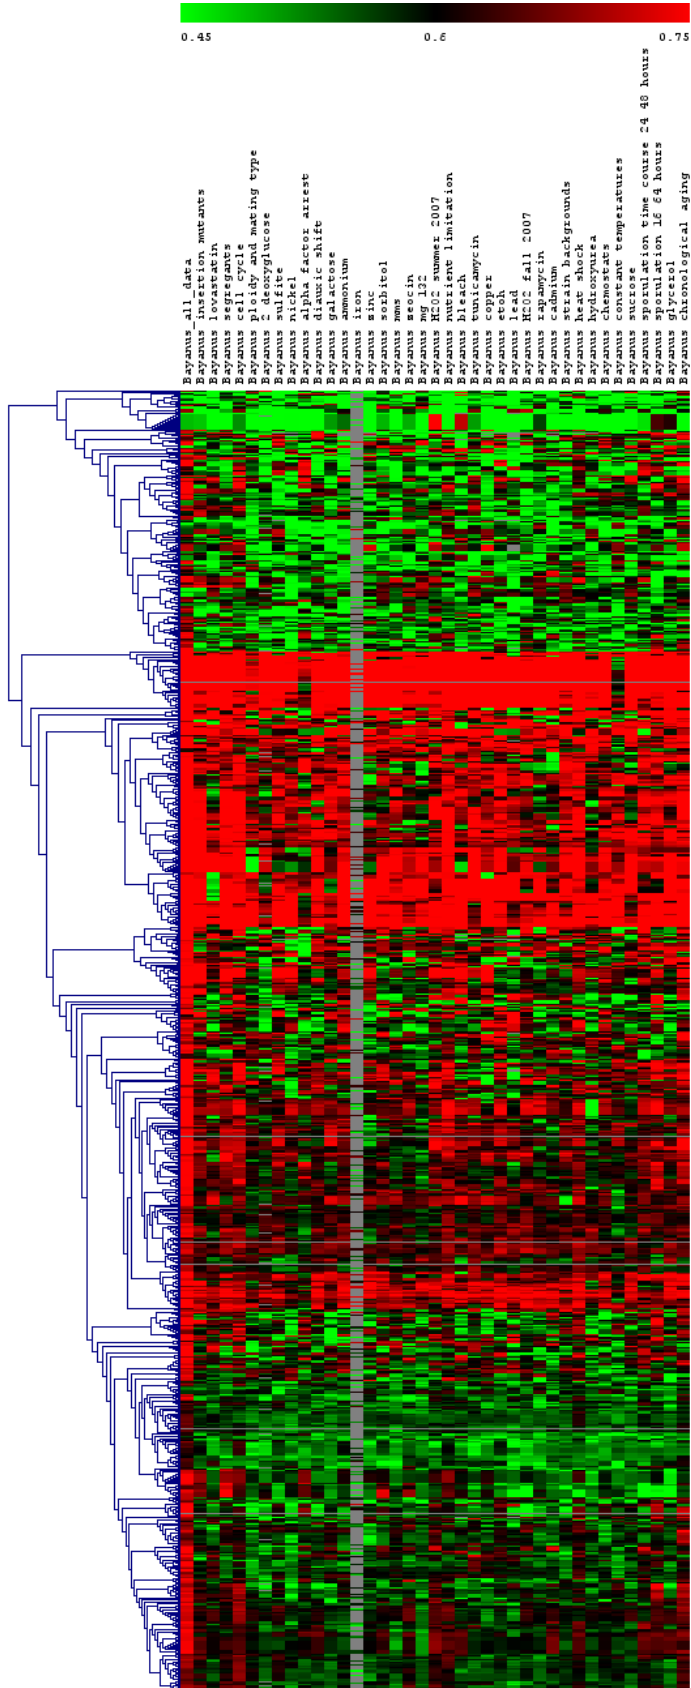

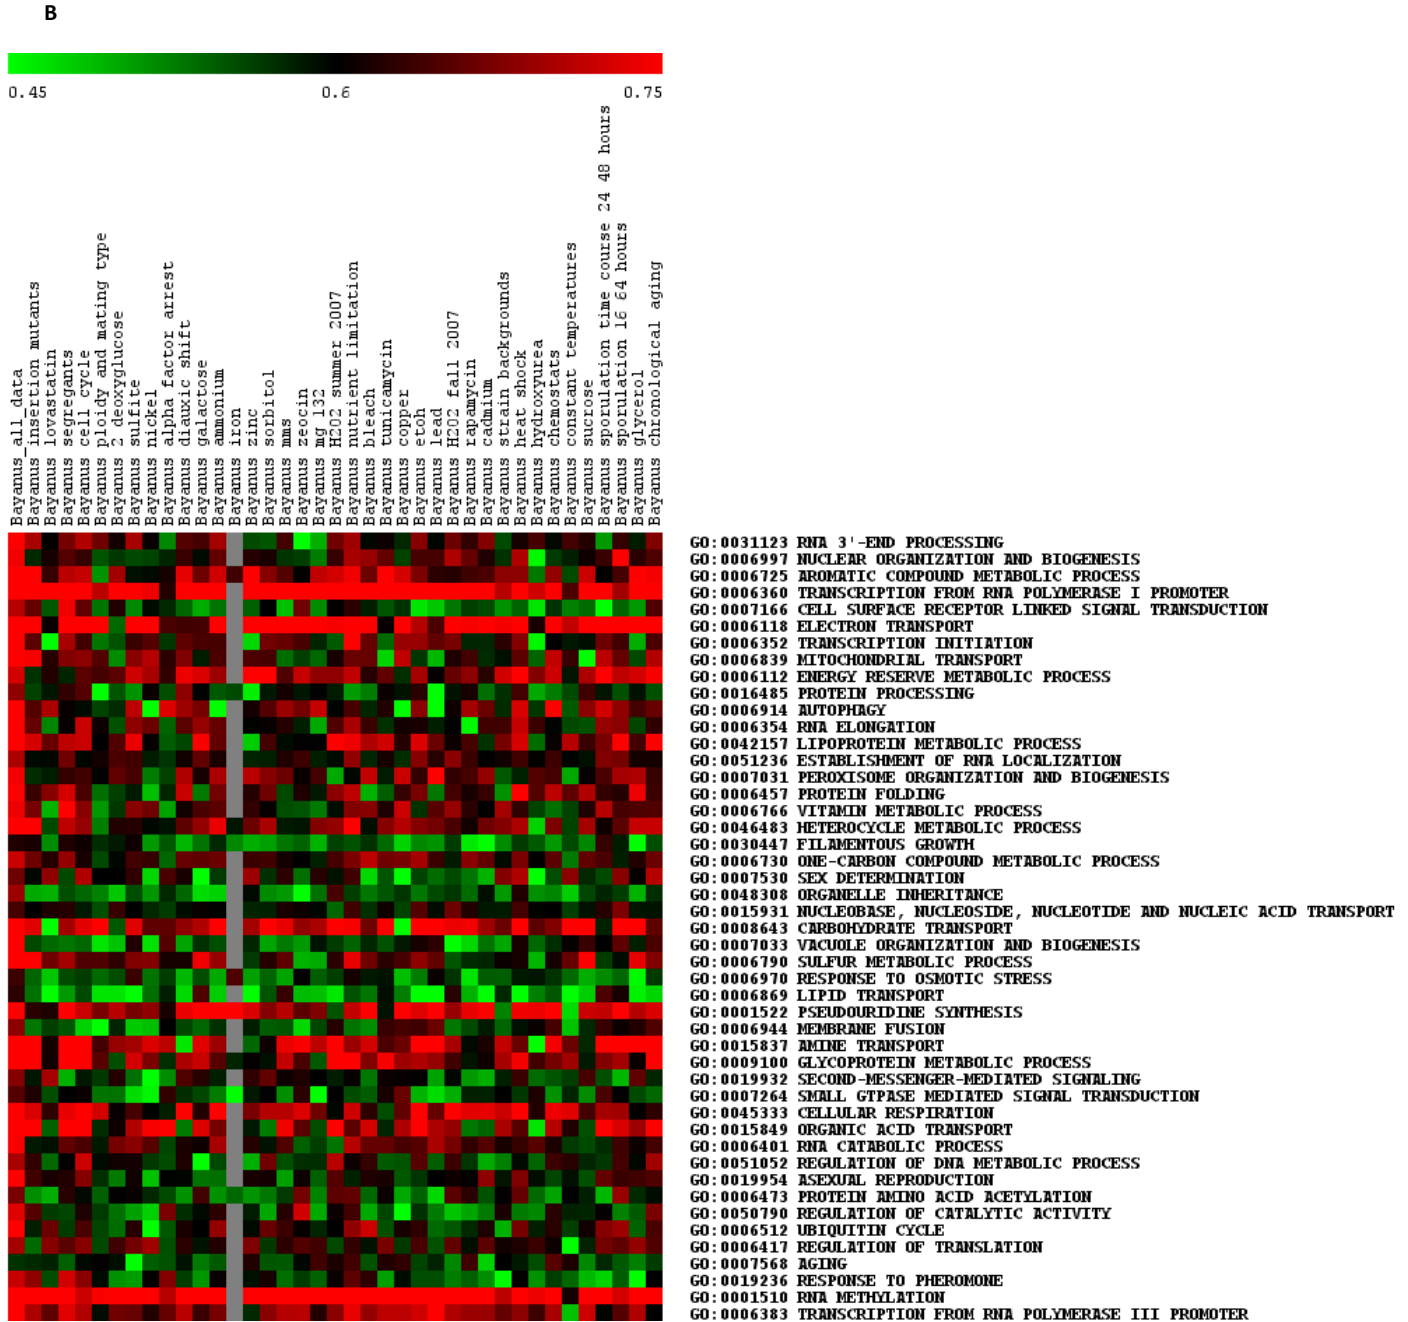

**Figure S7** The AUC (area under the precision/recall curve) for various biological functions predicted from *S. bayanus* gene expression data, shown for A. all GO terms and B. GO SLIM terms.
