# Supplementary material
Source: PubMed Central journal article supplement (PMC3761308)
Supplement: f6aa991fe8fc65ac3cbddea5467c5cf0_genetics.113.152918-1.pdf [file f6aa991fe8fc65ac3cbddea5467c5cf0_genetics.113.152918-1.pdf]

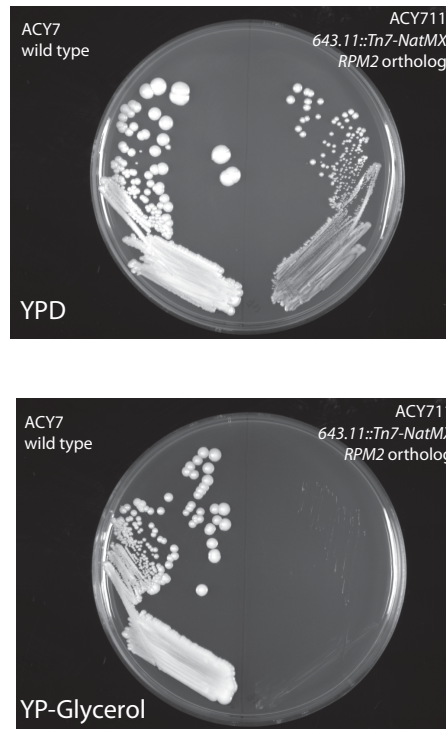

**Figure S3** The *643.11* knockout mutant (ortholog of *RPM2*) is respiratory deficient. The *643.11* knockout strain ACY711 and a wild type strain were struck for growth on SC glycerol and on YNB glucose medium.
