# Supplementary material
Source: PubMed Central journal article supplement (PMC3761308)
Supplement: fb056cab3192a7cc7ce3bd0c043c39ee_genetics.113.152918-9.pdf [file fb056cab3192a7cc7ce3bd0c043c39ee_genetics.113.152918-9.pdf]

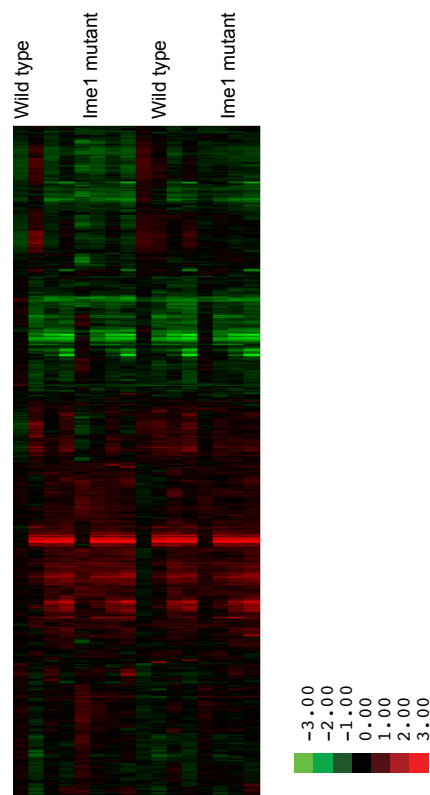

**Figure S2** Pheromone response in *670.55* knockout mutant (ortholog of *IME1*) is similar to wild type. The indicated mutant and wild type strains were grown in YPD and exposed to alpha factor pheromone. Samples were harvested for expression analysis. A heat map of the genome-wide expression data is presented, with the data transformed to the average expression of wild type samples at the moment of alpha factor addition.
